# Supplementary material for: Molecular mechanism of β-arrestin-2 pre-activation by phosphatidylinositol 4,5-bisphosphate
Source: EMBO Rep. 2024 Sep 6;25(10):12. doi: 10.1038/s44319-024-00239-x (PMC11467438; doi:10.1038/s44319-024-00239-x)
Supplement: Supplementary file 4 — Expanded View Figures [file 44319_2024_239_MOESM4_ESM.pdf]

## Expanded View Figures

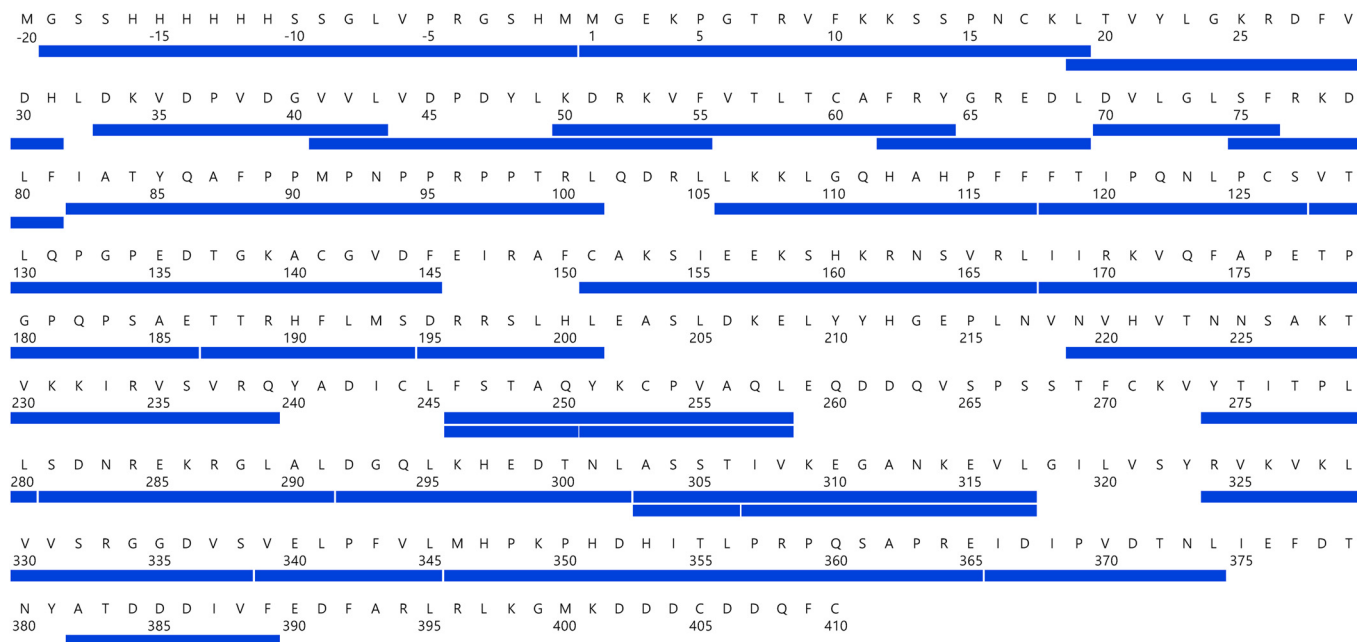

**Figure EV1. Sequence coverage map of wild-type  $\beta$ -arrestin-2 ( $\beta$ arr2).**

The blue bars indicate analyzed peptic peptides.

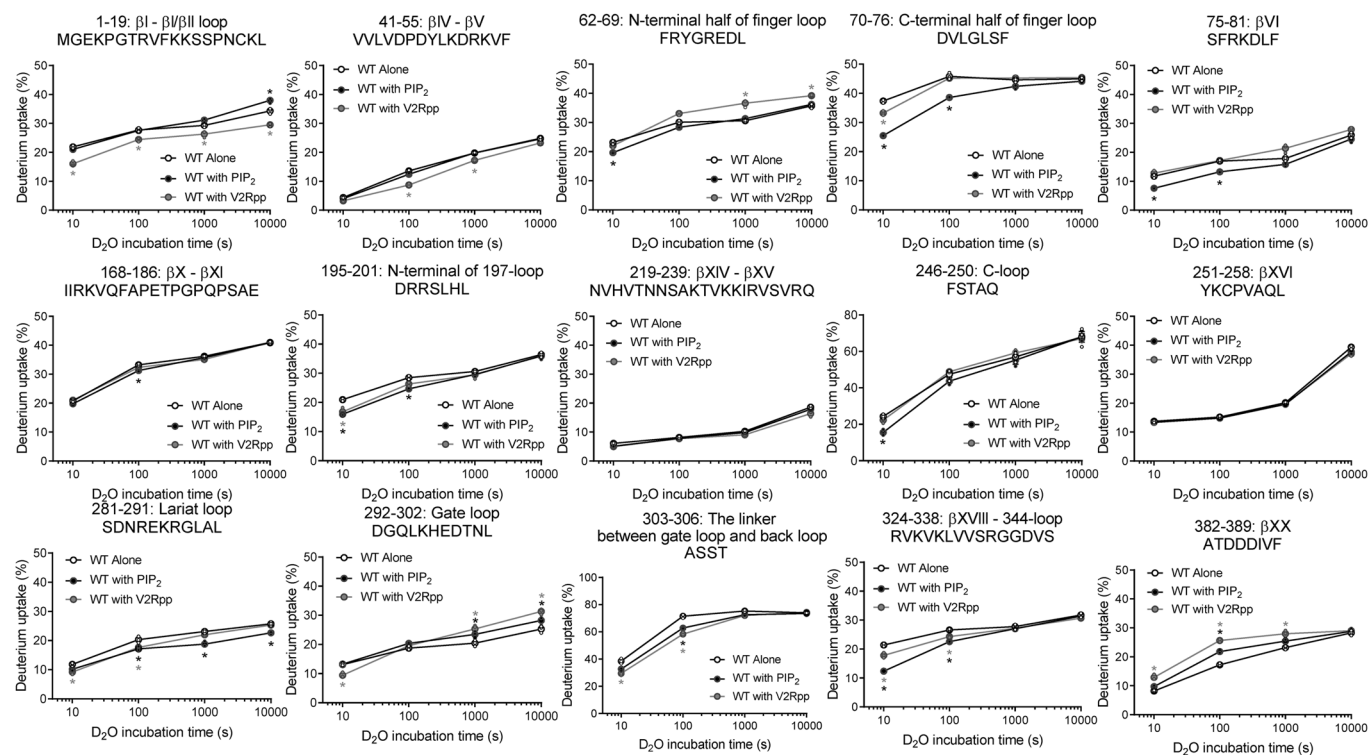

**Figure EV2. Deuterium uptake plots of selective peptides of WT  $\beta$ arr2 with or without V2Rpp or  $\text{PIP}_2$  co-incubation.**

Results were derived from three independent experiments. The statistical significance of the differences was determined using Student's *t* test (\**P* < 0.05). Exact *p*-values are provided in Dataset EV1. Data are presented as mean  $\pm$  standard error of the mean. Black or grey \* indicates statistically significant difference between apo WT  $\beta$ arr2 and  $\text{PIP}_2$ -bound WT  $\beta$ arr2 or V2Rpp-bound WT  $\beta$ arr2, respectively. Smaller symbols indicate each data point.

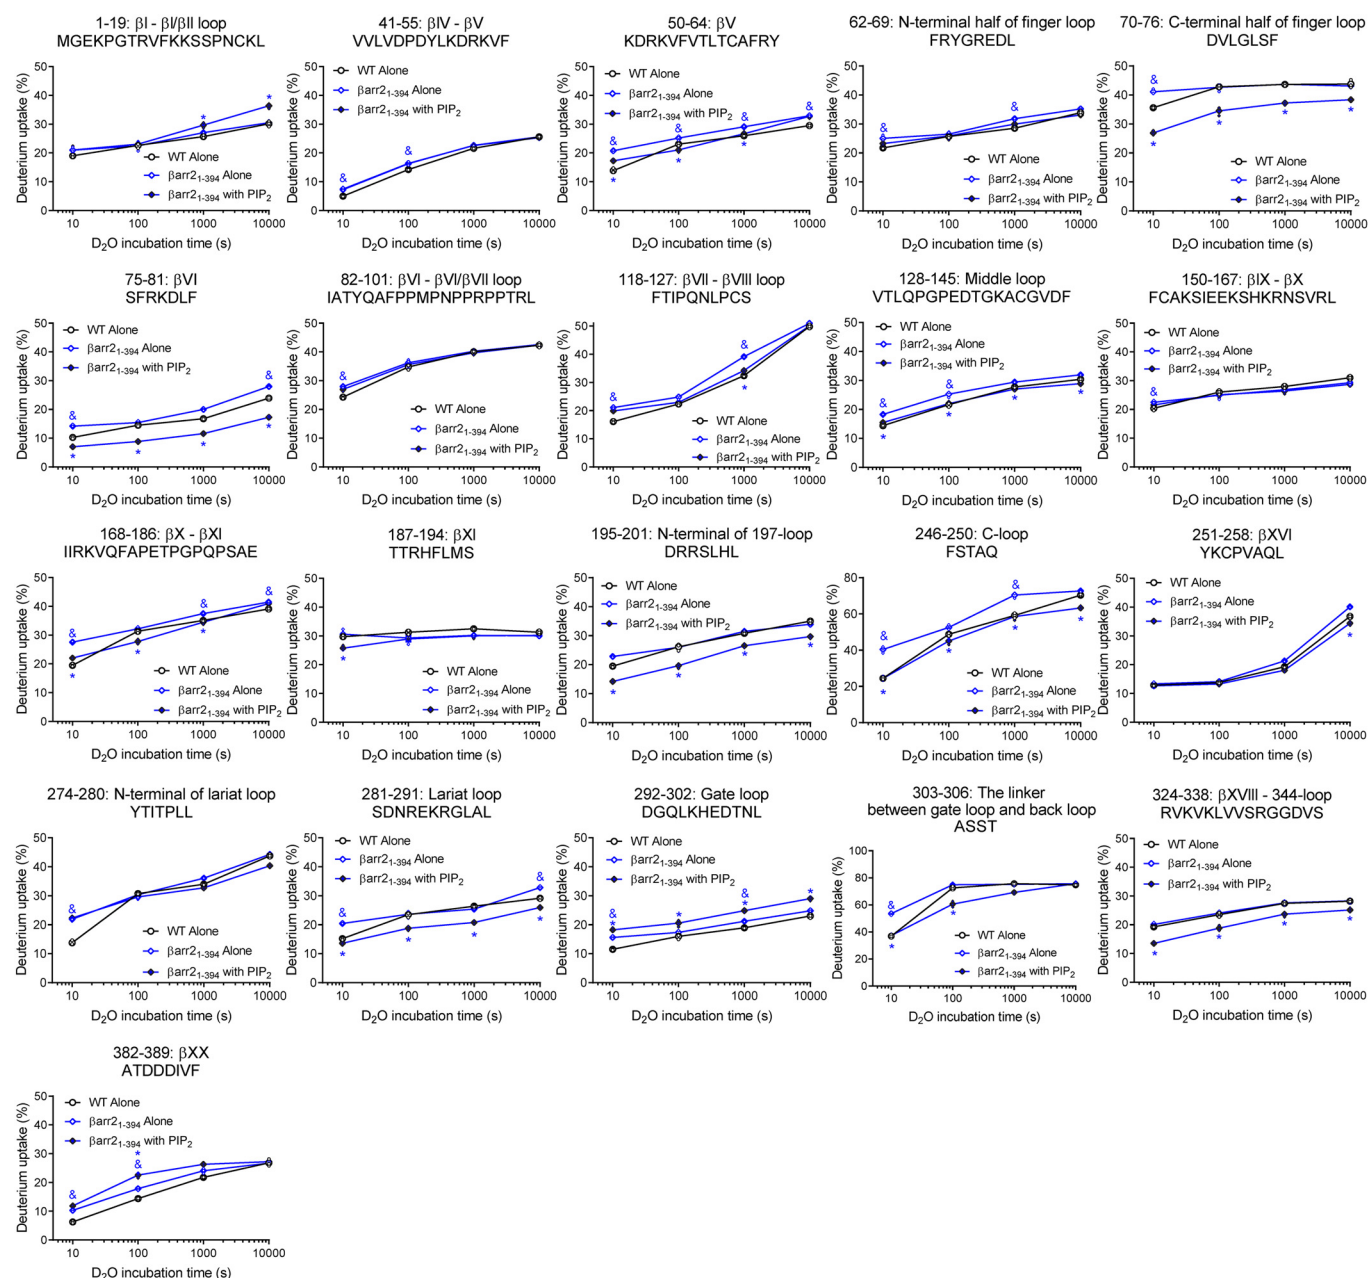

**Figure EV3. Deuterium uptake plots of selective peptides of apo WT  $\beta$ arr2 and  $\beta$ arr2\_1-394 with or without PIP<sub>2</sub> co-incubation.**

Results were derived from three independent experiments. The statistical significance of the differences was determined using Student's *t* test (&\**P* < 0.05). Exact *p*-values are provided in Dataset EV1. & indicates statistically significant difference between apo WT  $\beta$ arr2 and apo  $\beta$ arr2\_1-394. \* indicates statistically significant difference between apo and PIP<sub>2</sub>-bound  $\beta$ arr2\_1-394. Data are presented as mean  $\pm$  standard error of the mean. Smaller symbols indicate each data point.

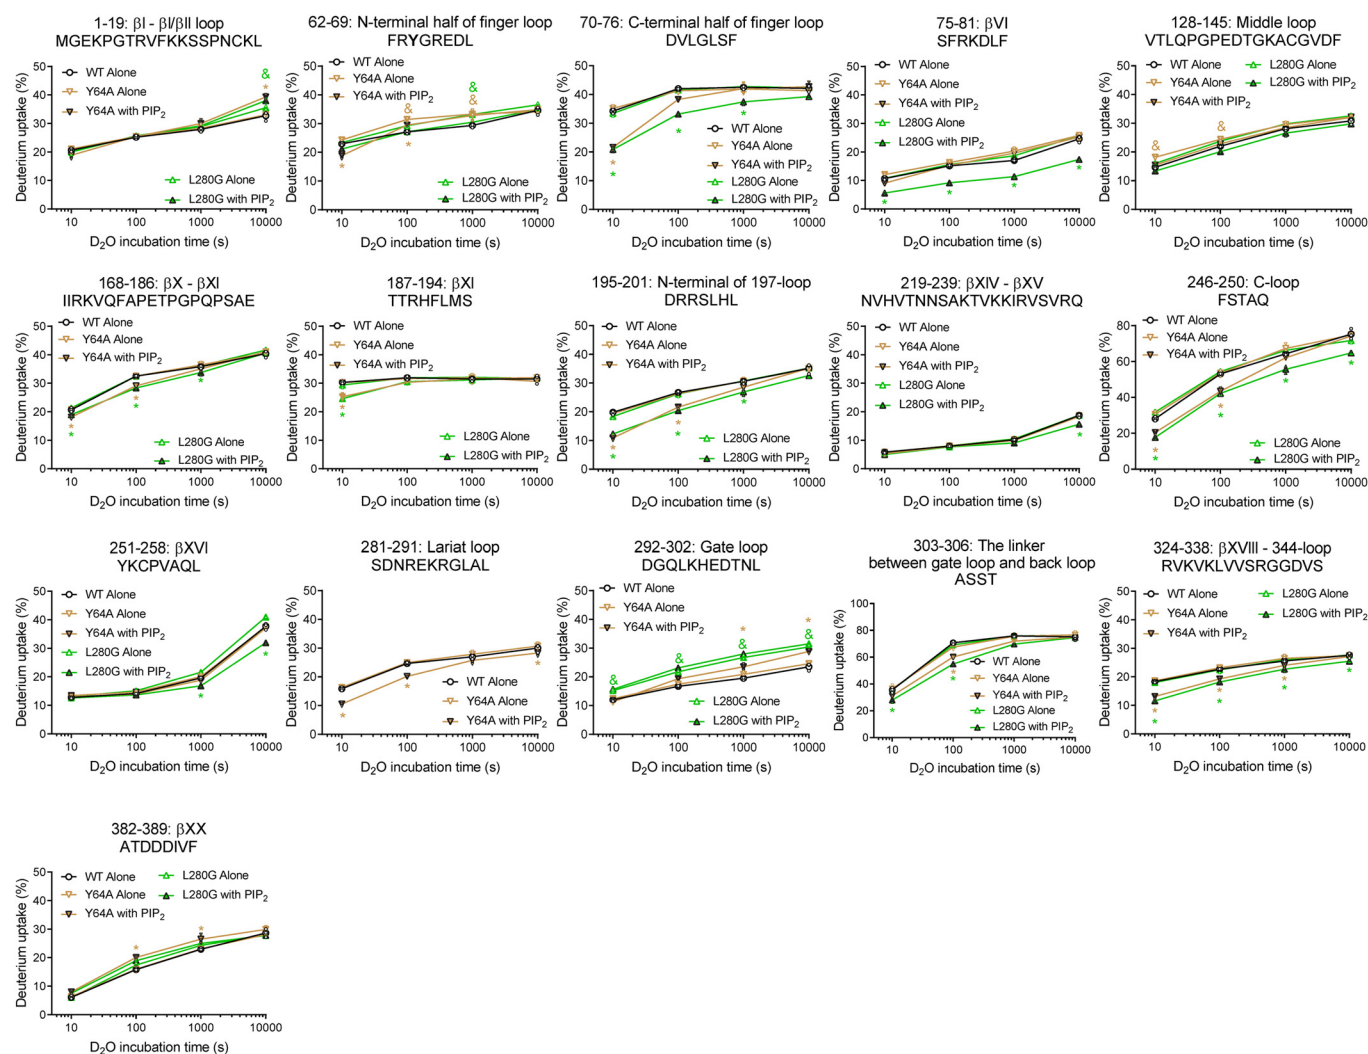

**Figure EV4. Deuterium uptake plots of selective peptides of apo WT  $\beta$ arr2 and Y64A and L280G with or without PIP<sub>2</sub> co-incubation.**

Results were derived from three independent experiments. The statistical significance of the differences was determined using Student's *t* test ( $^{*}P < 0.05$ ). Exact *p*-values are provided in Dataset EV1. Yellow green & indicates statistically significant difference between apo WT  $\beta$ arr2 and apo Y64A or L280G, respectively. Yellow or green \* indicates statistically significant difference between apo and PIP<sub>2</sub>-bound Y64A or L280G, respectively. Data are presented as mean  $\pm$  standard error of the mean. Smaller symbols indicate each data point.

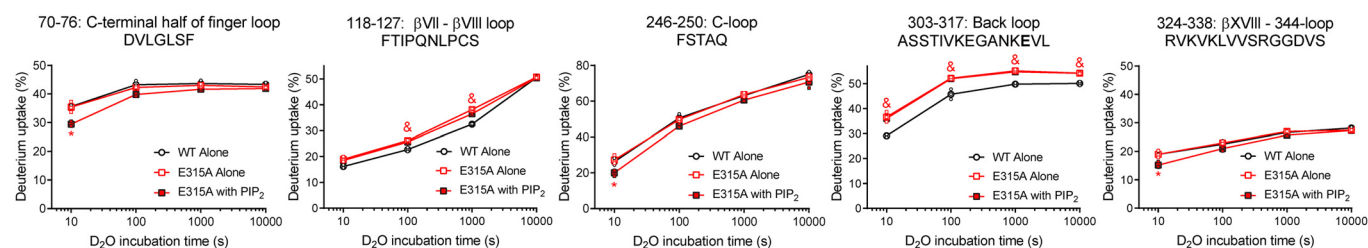

**Figure EV5. Deuterium uptake plots of selective peptides of apo WT  $\beta$ arr2 and E315A with or without PIP<sub>2</sub> co-incubation.**

Results were derived from three independent experiments. The statistical significance of the differences was determined using Student's *t* test (&#x26;\**P* < 0.05). Exact *p*-values are provided in Dataset EV1. &#x26; indicates statistically significant difference between apo WT  $\beta$ arr2 and apo E315A. \* indicates statistically significant difference between apo and PIP<sub>2</sub>-bound E315A. Data are presented as mean  $\pm$  standard error of the mean. Smaller symbols indicate each data point.
